# Supplementary material
Source: HighWire-hosted journal article supplement (https://www.cmajopen.ca/highwire/filestream/80704/field_highwire_adjunct_files/1/open-2012-0031-2-at.pdf)

**Appendix 2: Flow of patients through the trial.** Immediate release morphine unless otherwise stated. SR = sustained release, M = Morphine, HM = hydromorphone

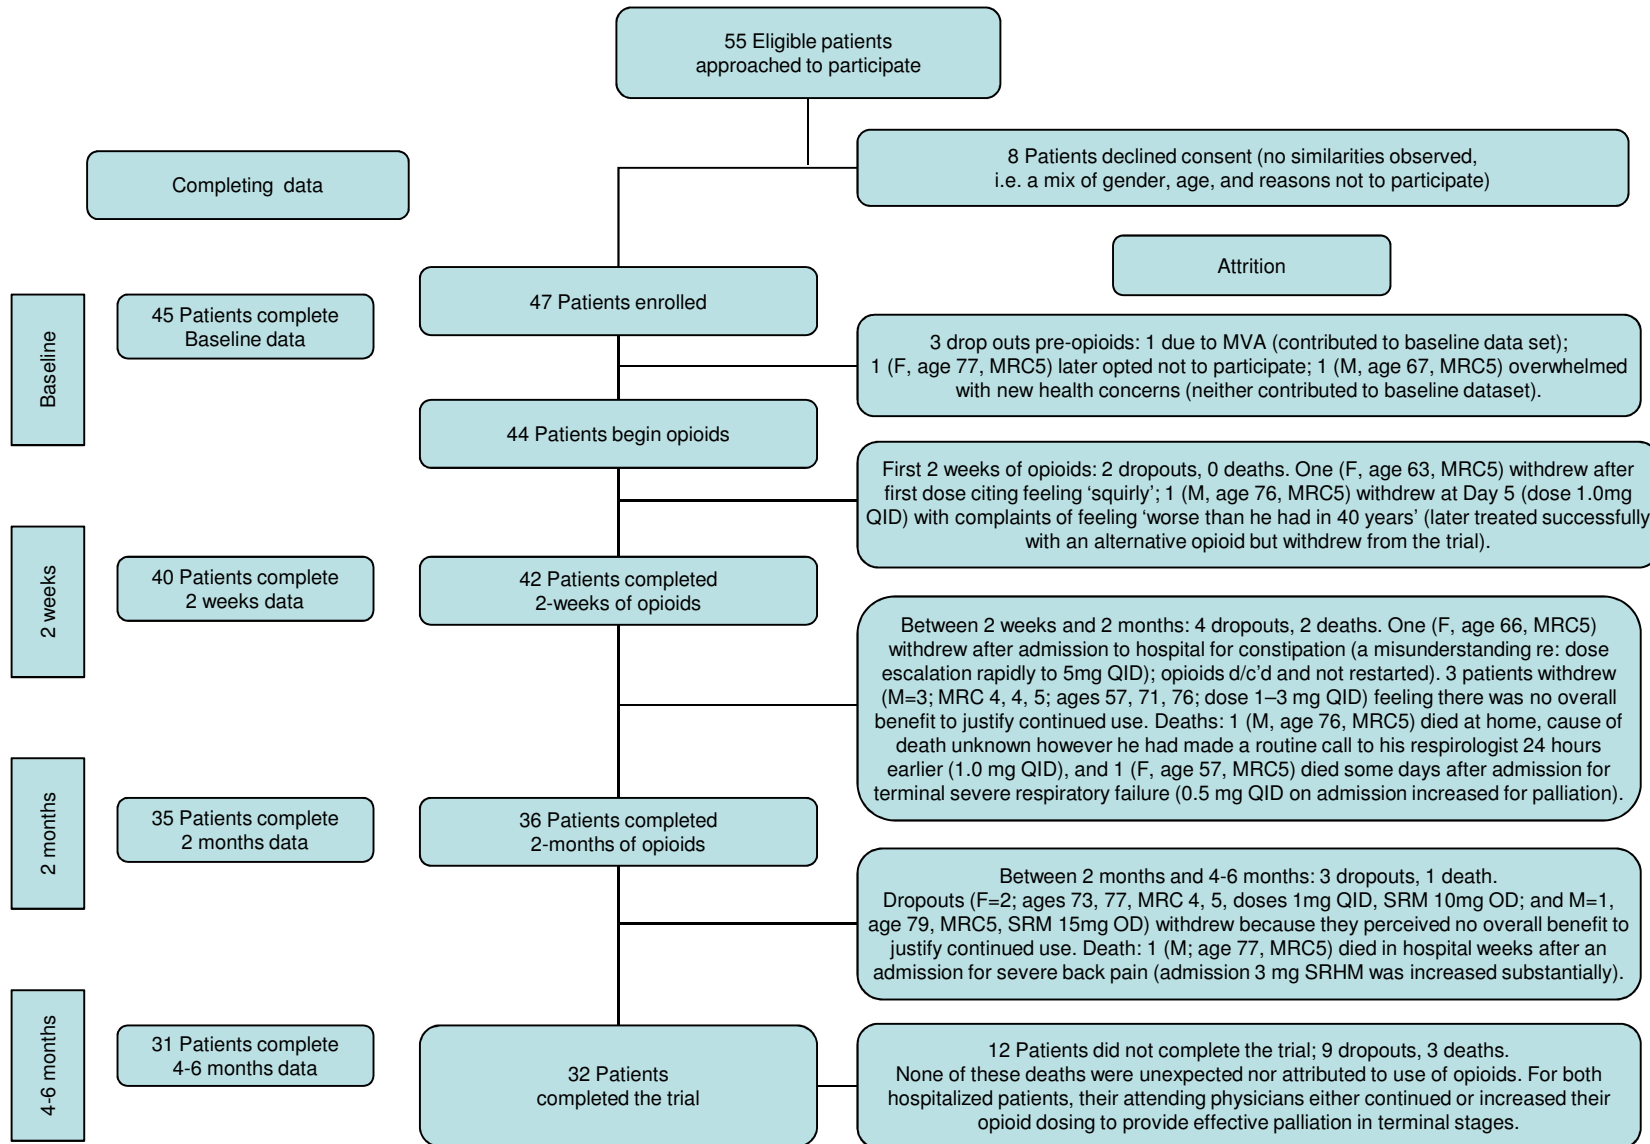

Supplement: open-2012-0031-2-at.pdf [file open-2012-0031-2-at.pdf]
